# Supplementary material for: Spatially resolved soil solution chemistry in a central European atmospherically polluted high-elevation catchment
Source: Copernicus journal article supplement (doi:10.5194/soil-2019-9), 2019-04-02
Supplement: Supplementary file 1 [file soil-2019-9-supplement.pdf]

## Supplementary Materials

# Spatially resolved soil solution chemistry in a central European atmospherically polluted high-elevation catchment

Daniel A. Petrash, Frantisek Buzek, Martin Novak, Bohuslava Cejkova, Pavel Kram, Tomas Chuman, Jan Curik, Frantisek Veselovsky, Marketa Stepanova, Oldrich Myska, Pavla Holeckova, Leona Bohdalkova

### Supplementary Materials:

Figure S1 Descriptive statistics (2012- 2013) for soil water concentration values of dissolved organic carbon, sulfate, nitrate, base cations, Al and chloride (in  $\text{mg L}^{-1}$ ) and pH values at the 50-cm depth at UDL.

Figure S2: Non-parametric multidimensional scaling ordination of time-series hydrochemical data for runoff, atmospheric in lysimeters.

Figure S3: Comparison of monthly precipitation volumes at UDL during the monitoring period (2012-2013) vs. the hydrologic years 2016-2017.

Table S1: Coefficient of variation ( $C_v = 100\sigma/\mu$ ) of inorganic species across our lysimeter network.

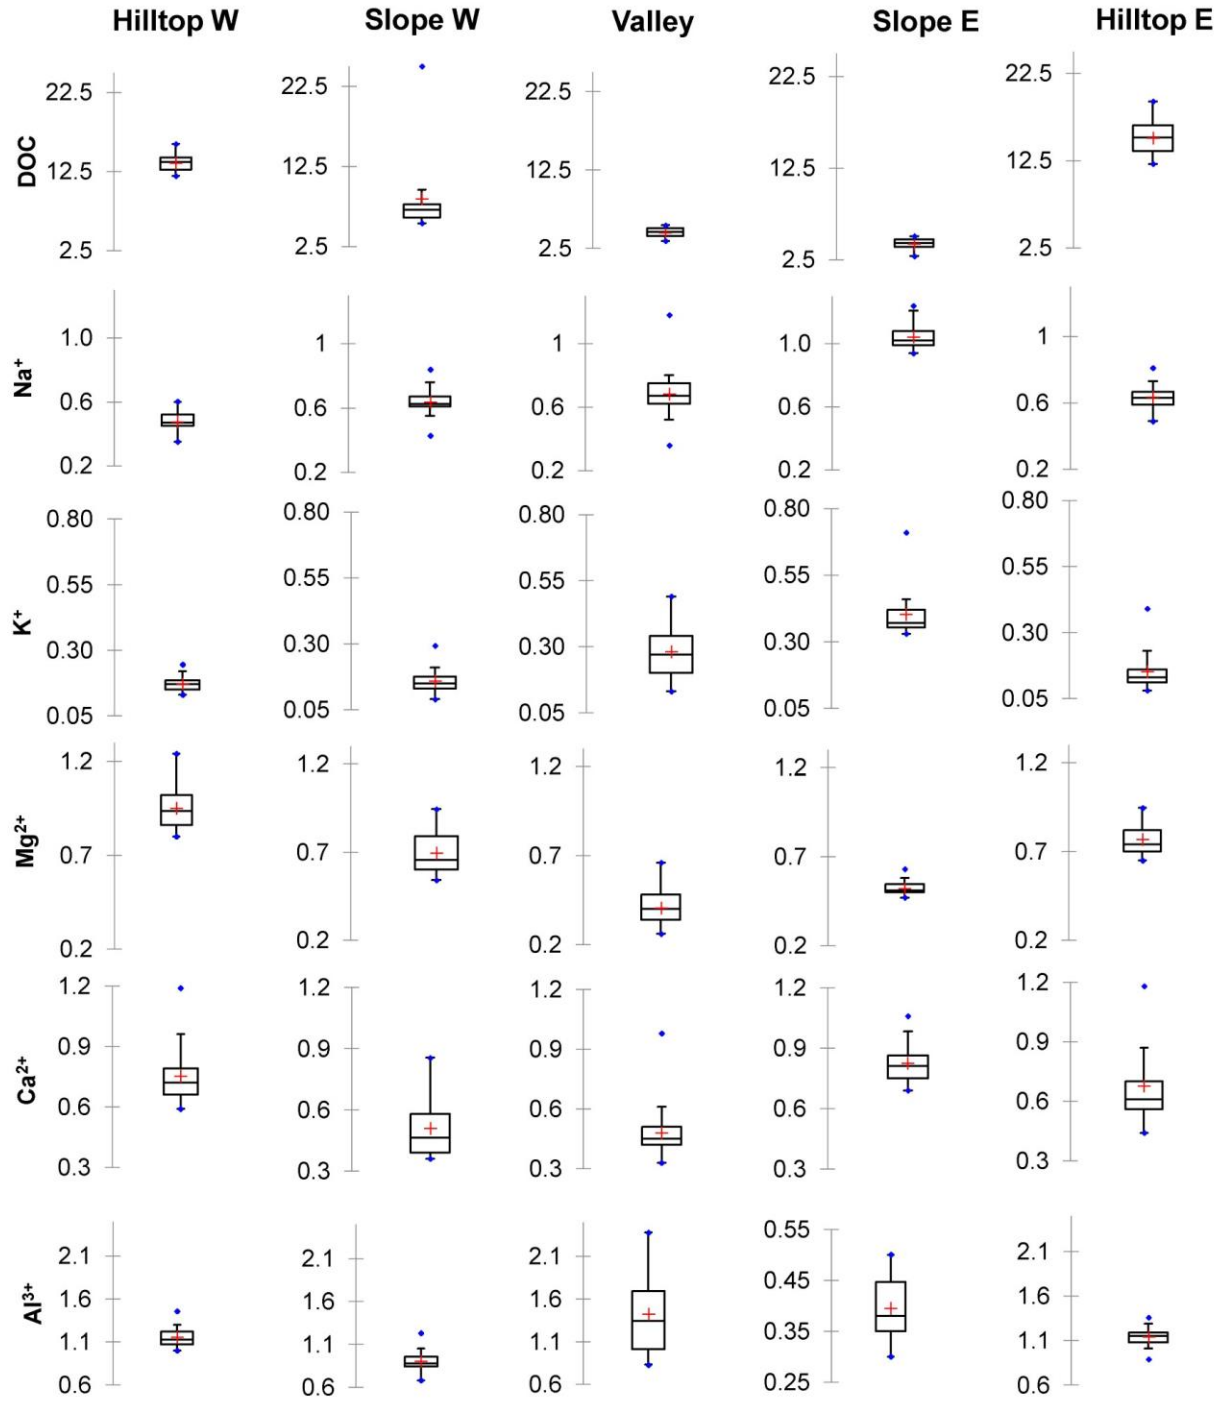

**Supplementary Material. Figure S1. Descriptive statistics (2012- 2013) for soil water concentration values of dissolved organic carbon, sulfate, nitrate, base cations, Al and chloride (in mg L<sup>-1</sup>) and pH values at the 50-cm depth at UDL. The statistical distribution shows minimum, first quartile, median, third quartile and maximum for individual samples**

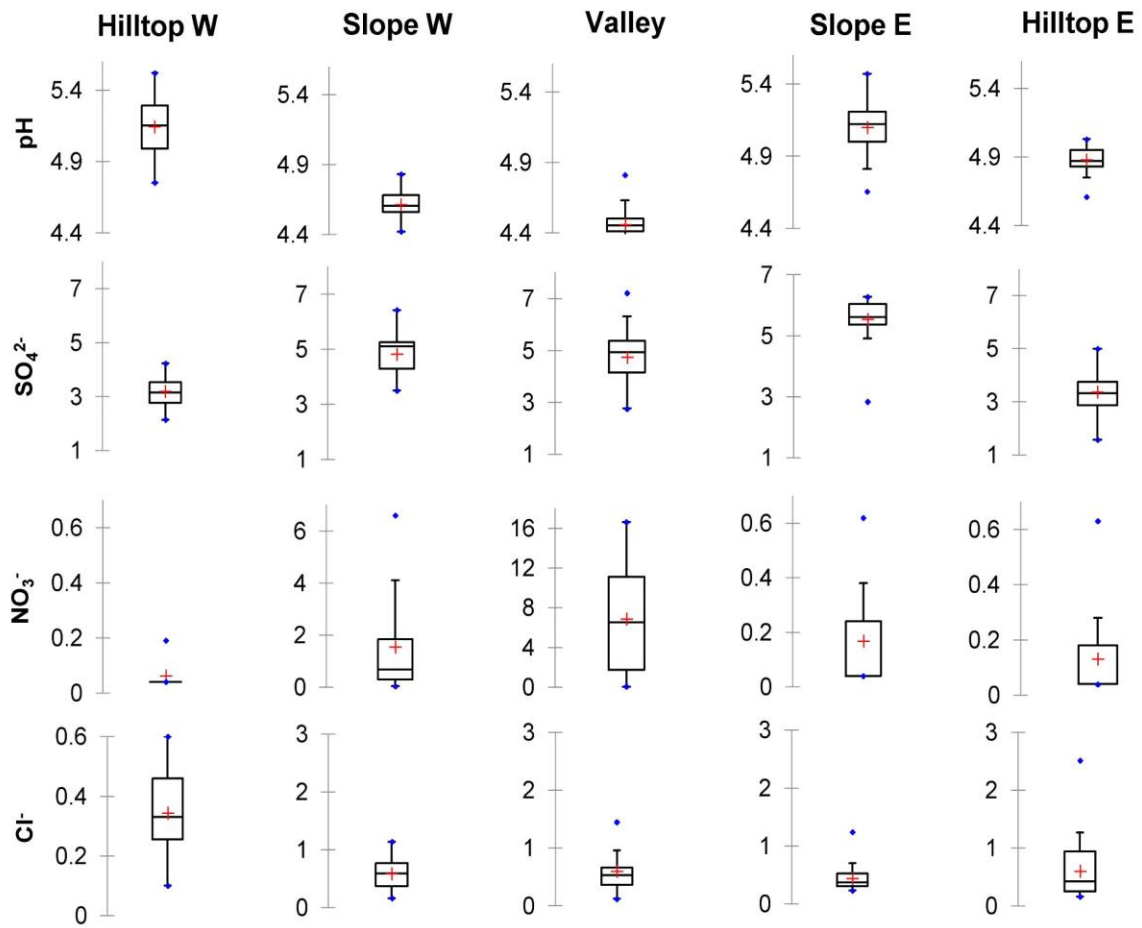

Supplementary Material. Figure S1. Cont.

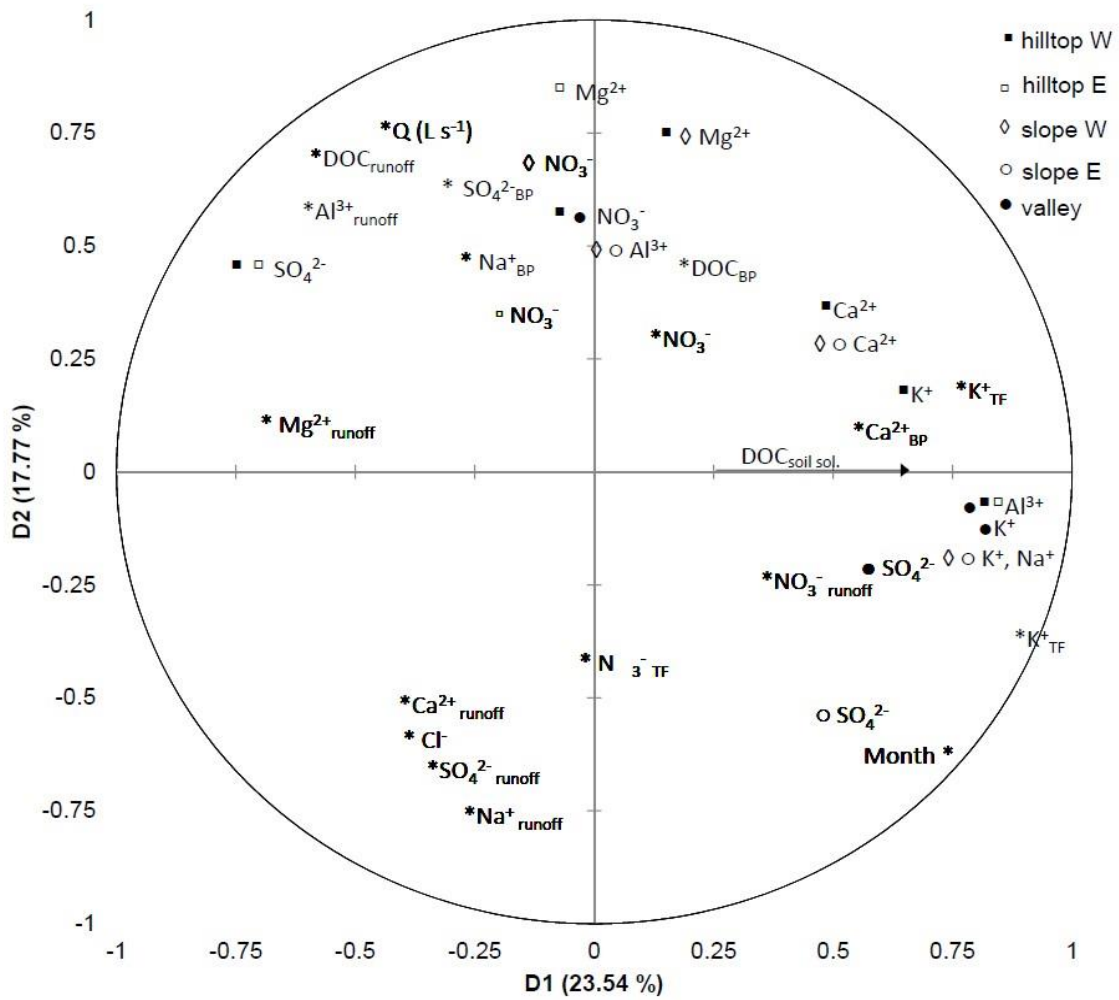

**Supplementary Material. Figure S2. Non-parametric multidimensional scaling ordination of time-series hydrochemical data for runoff, atmospheric in lysimeters. Note that only varimax rotated parameters exhibiting statistical significance > 0.25 are shown. The variables describe 41.3 % of the co-variation**

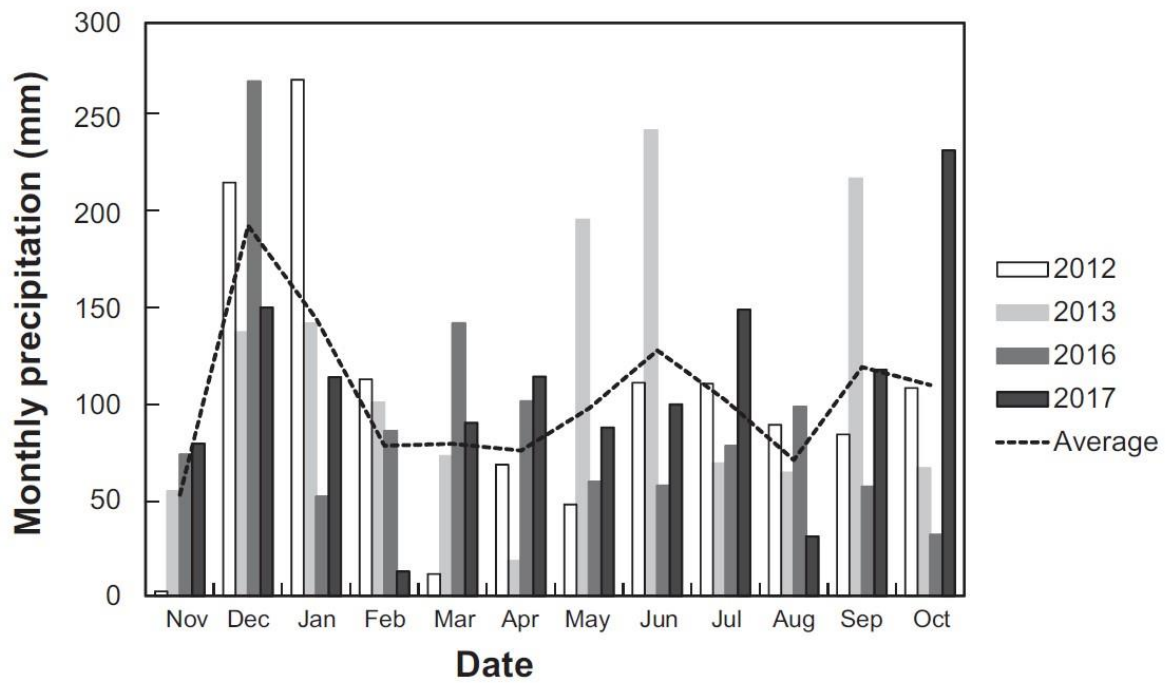

**Supplementary Material. Figure S3. Comparison of monthly precipitation volumes at UDL during the monitoring period (2012-2013) vs. the hydrologic years 2016-2017.**

**Supplementary Material. Table S1. Coefficient of variation (%) of inorganic species across our lysimeter network.**

| Analyte                       | Hilltops | Slopes | Valley |
|-------------------------------|----------|--------|--------|
| SO <sub>4</sub> <sup>2-</sup> | 17       | 17     | 15     |
| NO <sub>3</sub> <sup>-</sup>  | 2        | 15     | 17     |
| Al <sup>3+</sup>              | 8        | 10     | 12     |
| Na <sup>+</sup>               | 9        | 10     | 11     |
| K <sup>+</sup>                | 55       | 40     | 33     |
| Mg <sup>2+</sup>              | 12       | 21     | 15     |
| Ca <sup>2+</sup>              | 7        | 17     | 6      |

Calculation is based on six triplicates for hilltop and slopes and three triplicates for the valley location. The triplicates were obtained each fourth month.
